# Supplementary material for: Planetary Health and Planetary Nursing Awareness Scale: Scale Development Study
Source: Research Square preprint supplement (doi:10.21203/rs.3.rs-8457797/v1), 2026-01-06
Supplement: Supplementary file 1 [file c16eac33fc4016ad20a37092.docx]

**APPENDIX 1**

**PLANETARY HEALTH AND PLANETARY NURSING AWARENESS SCALE**

| **Items** | **Strongly Disagree** | **Disagree** | **Undecided** | **Agree** | **Strongly Agree** |
| --- | --- | --- | --- | --- | --- |
| 1. Reducing ecological footprint is the responsibility of every individual. |  |  |  |  |  |
| 2. Ecosystems are closely related to public health. |  |  |  |  |  |
| 3. Attention should be paid to the use of medical supplies to protect world resources. |  |  |  |  |  |
| 4. Protection and improvement of health are important for the planetary health |  |  |  |  |  |
| 5. Prevention of infectious diseases positively affects planetary health. |  |  |  |  |  |
| 6. Good planetary health is important for future generations. |  |  |  |  |  |
| 7. Humans are a part of nature. |  |  |  |  |  |
| 8. The appropriate use of medical supplies is important for the protection of the planetary health. |  |  |  |  |  |
| 9. Access to natural resources affects human health. |  |  |  |  |  |
| 10. Complying with medical waste guidelines is important for the planetary health. |  |  |  |  |  |
| 11. Planetary health is directly related to the health of living beings |  |  |  |  |  |
| 12. Preventive health services have a positive effect on the planetary health. |  |  |  |  |  |
| 13. Climate change affects human health. |  |  |  |  |  |
| 14. Nurses should be trained on planetary health. |  |  |  |  |  |
| 15. Planetary health is closely related to the health of present-day humans and future generations. |  |  |  |  |  |
| 16. Providing natural lighting with sunlight in hospitals is essential for the planetary health. |  |  |  |  |  |
